# Supplementary material
Source: Springer Nature journal article supplement (https://www.springerprofessional.de/resource/supplementary/13673_2013_37_MOESM2_ESM.pdf/11899364)

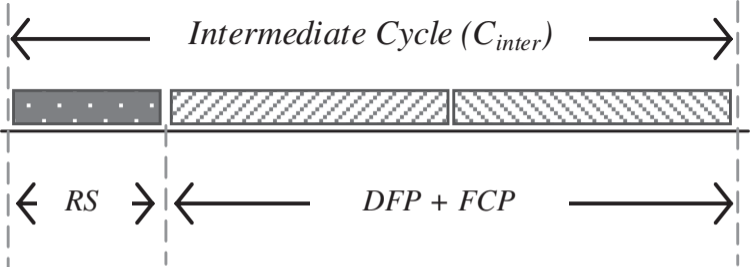

 : Random Sensing

 : Local Data Fusion Phase

 : Global Data Fusion Phase

Supplement: MOESM2 [file 11899364]
